# Supplementary material for: Load-sharing biomechanics of lumbar fixation and fusion with pedicle subtraction osteotomy
Source: Springer Nature journal article supplement (doi:10.1038/s41598-021-83251-8), 2021-02-11
Supplement: MOESM1 [file 41598_2021_83251_MOESM1_ESM.pdf]

# **Load-sharing biomechanics of lumbar fixation and fusion with pedicle subtraction osteotomy**

Luigi La Barbera <sup>a</sup>(\*), Hans-Joachim Wilke <sup>b</sup>, Maria Luisa Ruspi <sup>c</sup>, Marco Palanca <sup>c</sup>, Christian Liebsch <sup>b</sup>,  
Andrea Luca <sup>d</sup>, Marco Brayda-Bruno <sup>d</sup>, Fabio Galbusera <sup>e</sup>, Luca Cristofolini <sup>c</sup>

<sup>a</sup> Laboratory of Biological Structure Mechanics, Department of Chemistry, Materials and Chemical Engineering “G. Natta”, Politecnico di Milano, Milan, Italy

<sup>b</sup> Institute of Orthopaedic Research and Biomechanics, Trauma Research Center Ulm, Ulm University, Ulm, Germany

<sup>c</sup> Department of Industrial Engineering, School of Engineering and Architecture, Alma Mater Studiorum – Università di Bologna, Bologna, Italy

<sup>d</sup> Department of Spine Surgery III, IRCCS Istituto Ortopedico Galeazzi, Milan, Italy

<sup>e</sup> IRCCS Istituto Ortopedico Galeazzi, Milan, Italy

(\*) *Corresponding author:*

[luigi.labarbera@polimi.it](mailto:luigi.labarbera@polimi.it)

Laboratory of Biological Structure Mechanics

Department of Chemistry, Materials and Chemical Engineering “Giulio Natta”

Politecnico di Milano

Piazza Leonardo da Vinci 32

20133 Milano

Italy

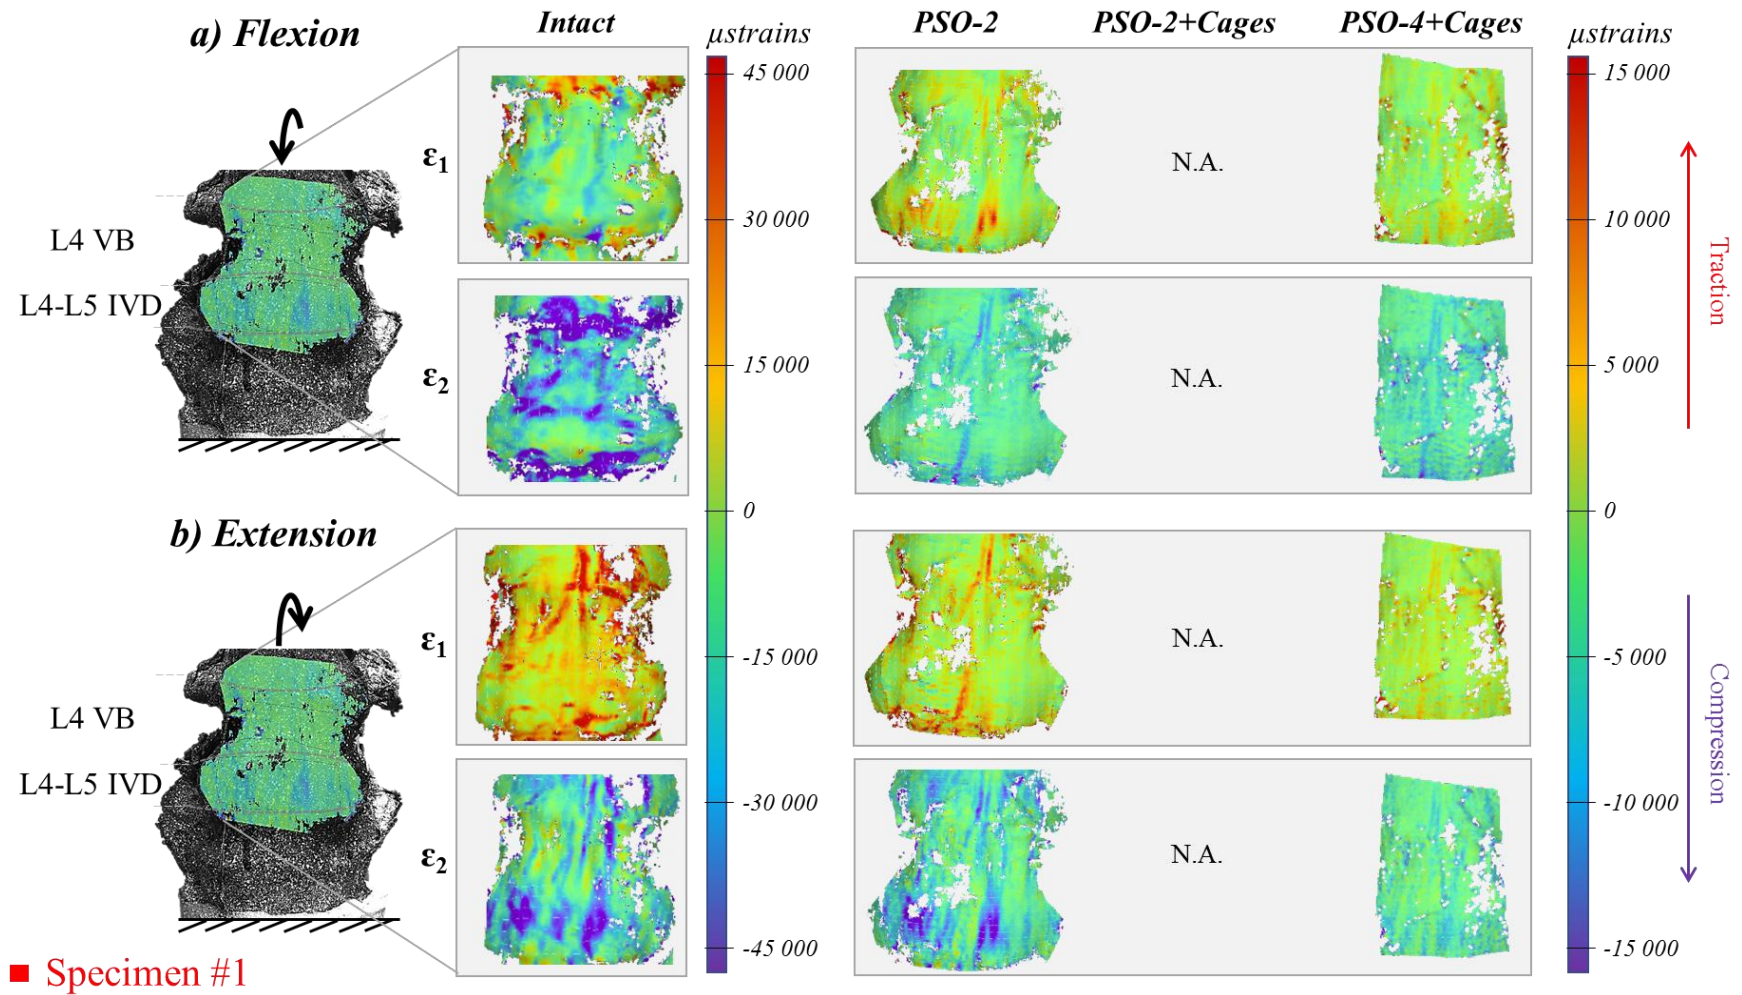

**Supplementary Figure 1:** Specimen #1 – Flexion (a) and extension (b): tensile ( $\epsilon_1$ ) and compressive ( $\epsilon_2$ ) strain maps measured on the “Intact” condition and following PSO at L4 and posterior instrumentation with 2 primary-rods (“PSO-2”), with 2 rods and supplementary intervertebral cages (“PSO-2+Cages”), and with supplementary accessory rods and intervertebral cages (“PSO-4+Cages”). A picture of the specimen with the correlated areas are reported on the left, indicating the treated level (L4) and the caudal IVD (L4-L5). The DIC strain maps have been obtained using the proprietary software Istra 4D (v4.3.1, Dantec Dynamics, Denmark; URL: <https://www.dantecdynamics.com/>).

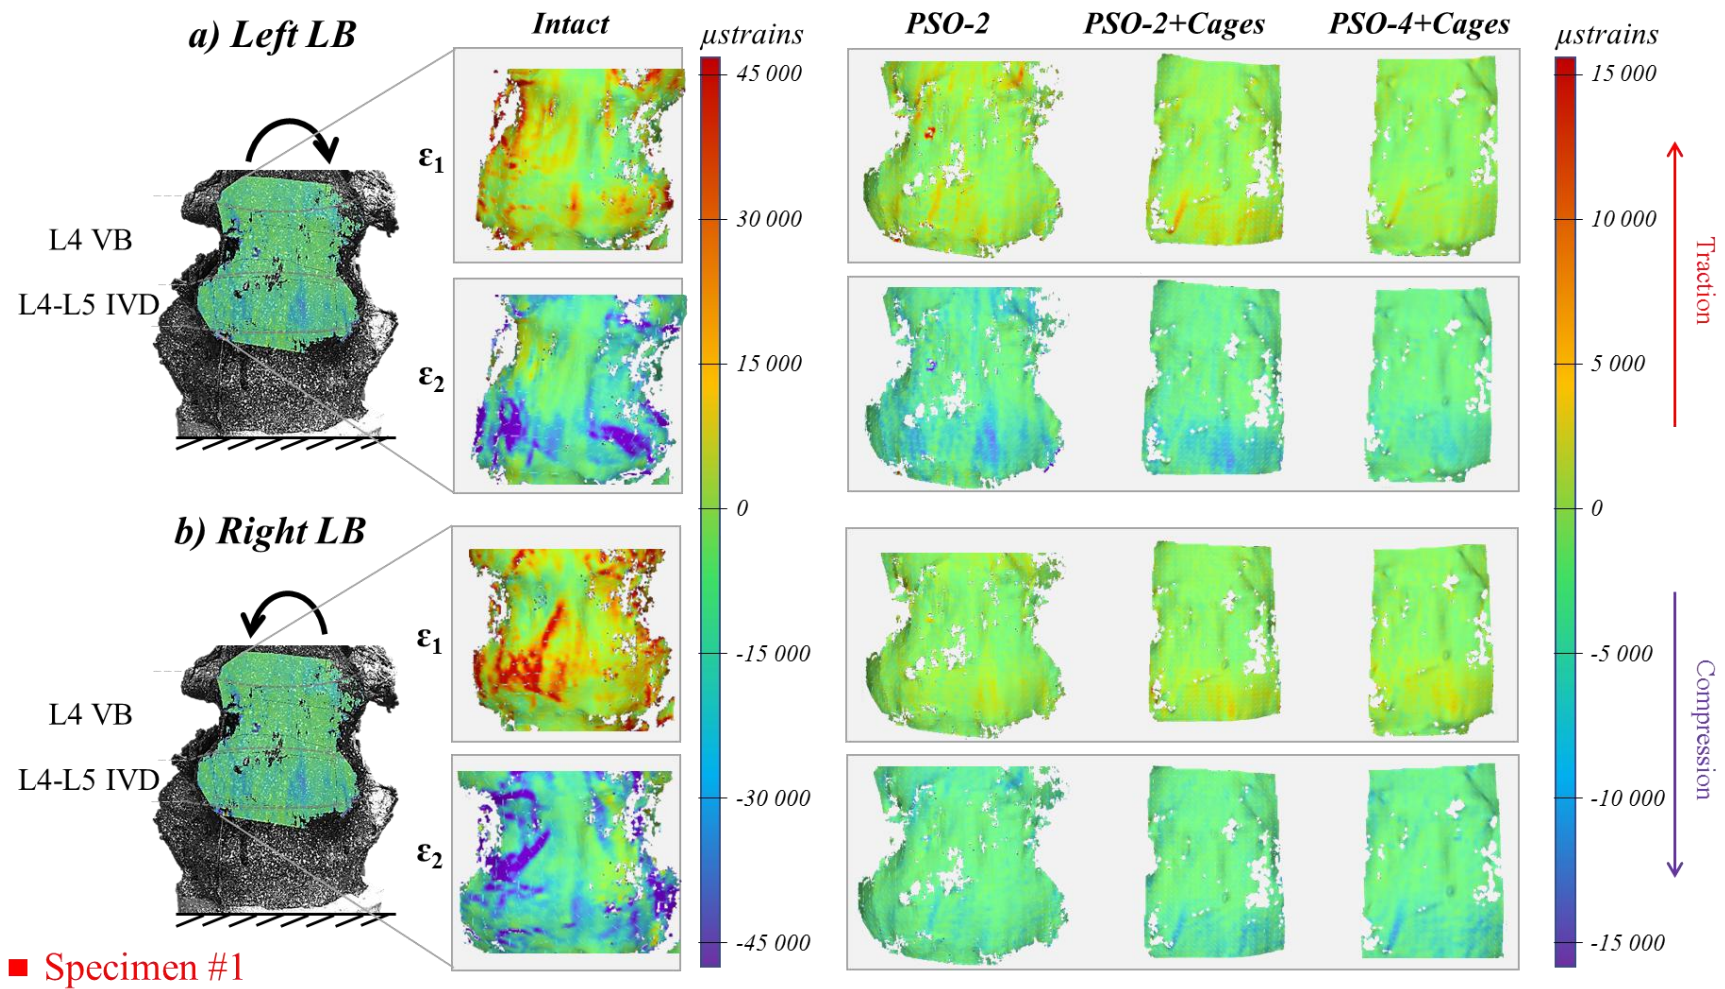

**Supplementary Figure 2:** Specimen #1 – Lateral bending (LB) left (a) and right (b): tensile ( $\epsilon_1$ ) and compressive ( $\epsilon_2$ ) strain maps measured on the “Intact” condition and following PSO at L4 and posterior instrumentation with 2 primary-rods (“PSO-2”), with 2 rods and supplementary intervertebral cages (“PSO-2+Cages”), and with supplementary accessory rods and intervertebral cages (“PSO-4+Cages”). A picture of the specimen with the correlated areas are reported on the left, indicating the treated level (L4) and the caudal IVD (L4-L5). The DIC strain maps have been obtained using the proprietary software Istra 4D (v4.3.1, Dantec Dynamics, Denmark; URL: <https://www.dantecdynamics.com/>).



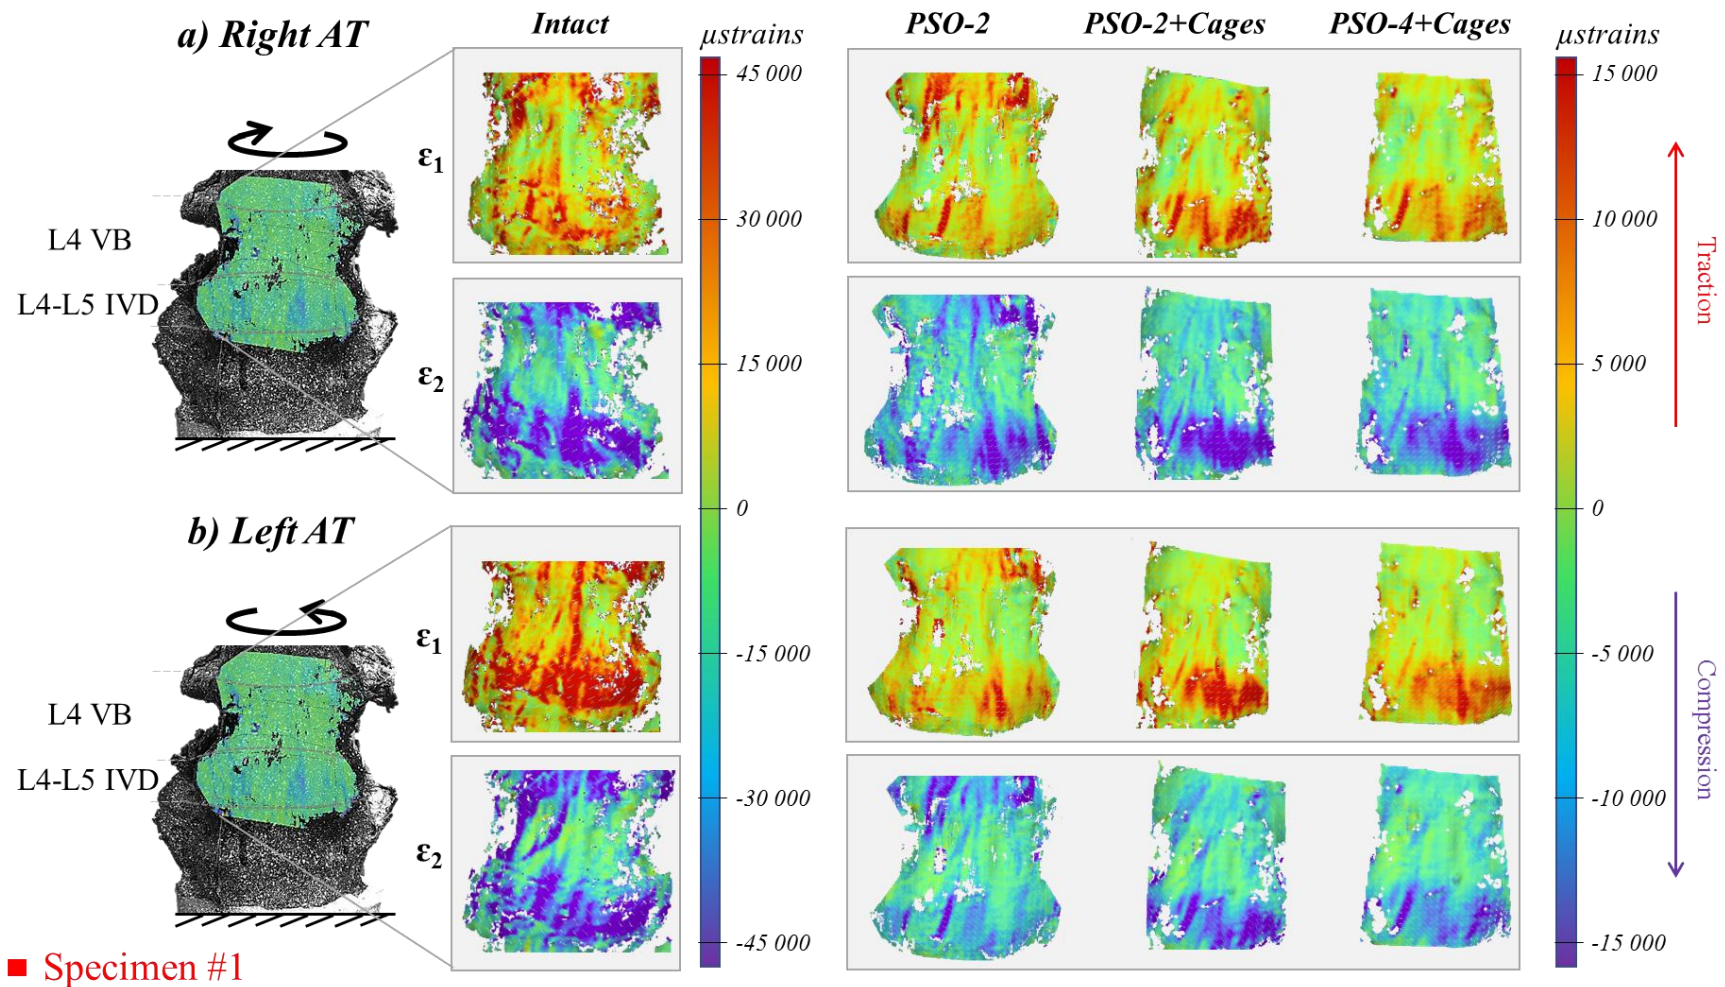

■ Specimen #1

**Supplementary Figure 3:** Specimen #1 – Axial torsion (AT) right (a) and left (b): tensile ( $\epsilon_1$ ) and compressive ( $\epsilon_2$ ) strain maps measured on the “Intact” condition and following PSO at L4 and posterior instrumentation with 2 primary-rods (“PSO-2”), with 2 rods and supplementary intervertebral cages (“PSO-2+Cages”), and with supplementary accessory rods and intervertebral cages (“PSO-4+Cages”). A picture of the specimen with the correlated areas are reported on the left, indicating the treated level (L4) and the caudal IVD (L4-L5). The DIC strain maps have been obtained using the proprietary software Istra 4D (v4.3.1, Dantec Dynamics, Denmark; URL: <https://www.dantecdynamics.com/>).

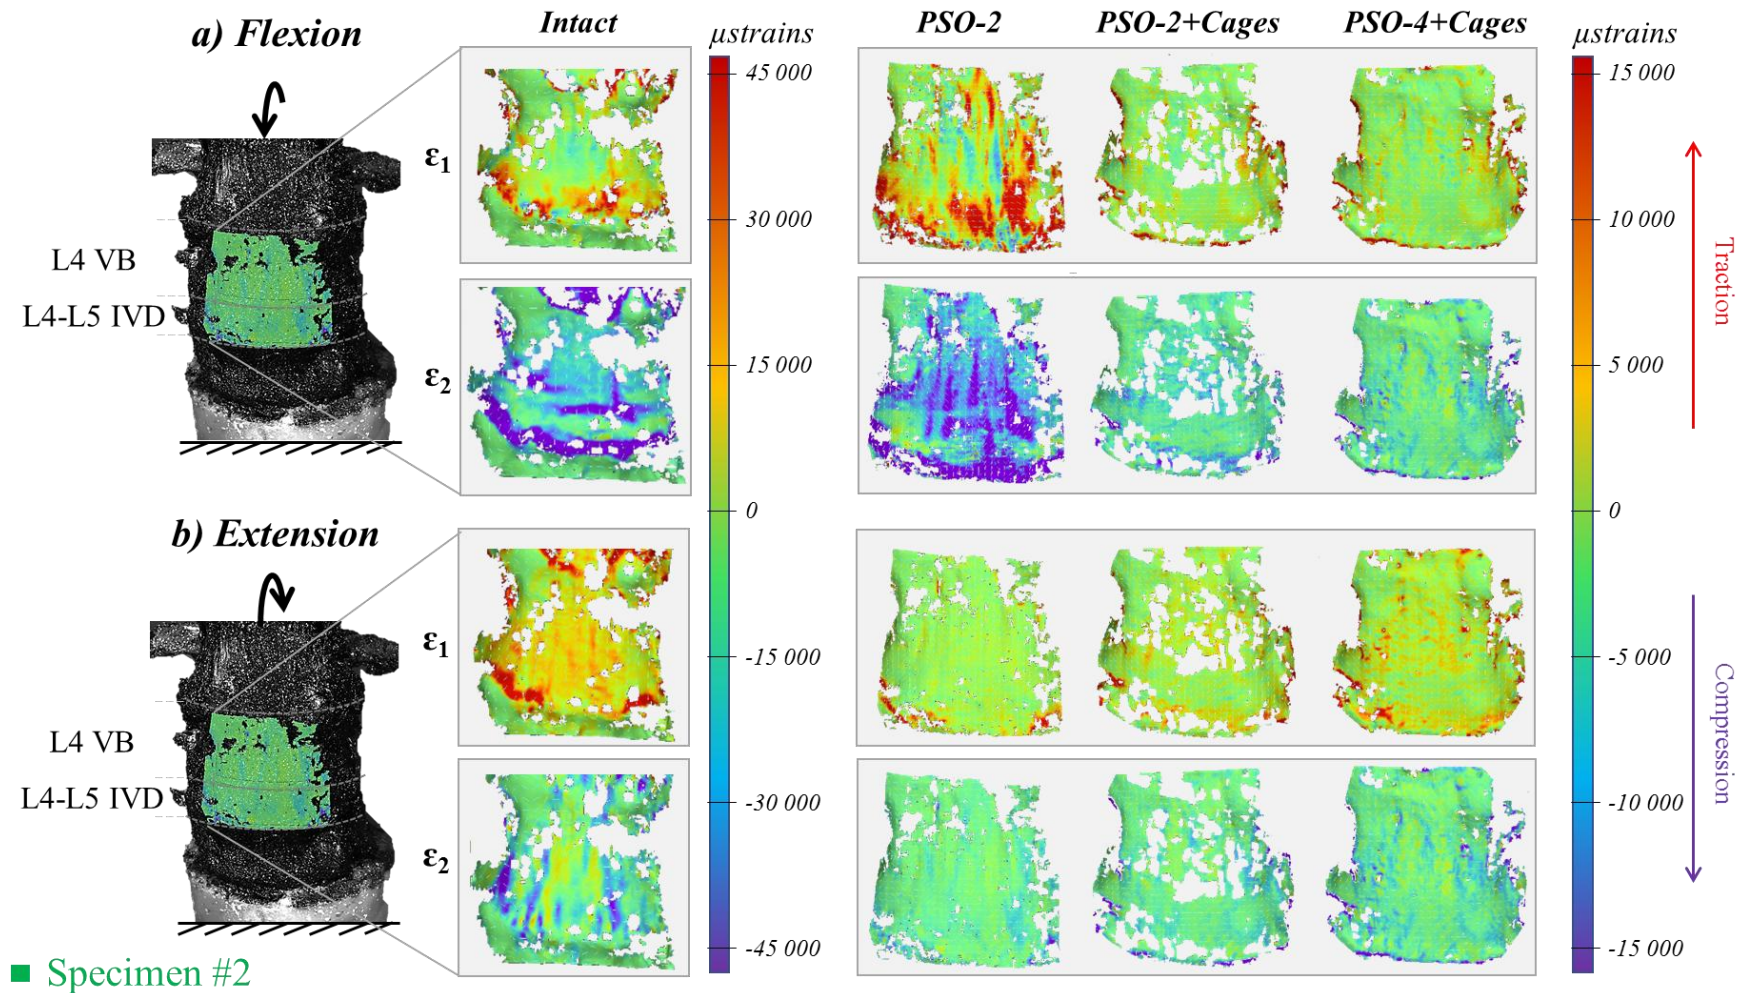

**Supplementary Figure 4:** Specimen #2 – Flexion (a) and extension (b): tensile ( $\epsilon_1$ ) and compressive ( $\epsilon_2$ ) strain maps measured on the “Intact” condition and following PSO at L4 and posterior instrumentation with 2 primary-rods (“PSO-2”), with 2 rods and supplementary intervertebral cages (“PSO-2+Cages”), and with supplementary accessory rods and intervertebral cages (“PSO-4+Cages”). A picture of the specimen with the correlated areas are reported on the left, indicating the treated level (L4) and the caudal IVD (L4-L5). The DIC strain maps have been obtained using the proprietary software Istra 4D (v4.3.1, Dantec Dynamics, Denmark; URL: <https://www.dantecdynamics.com/>).



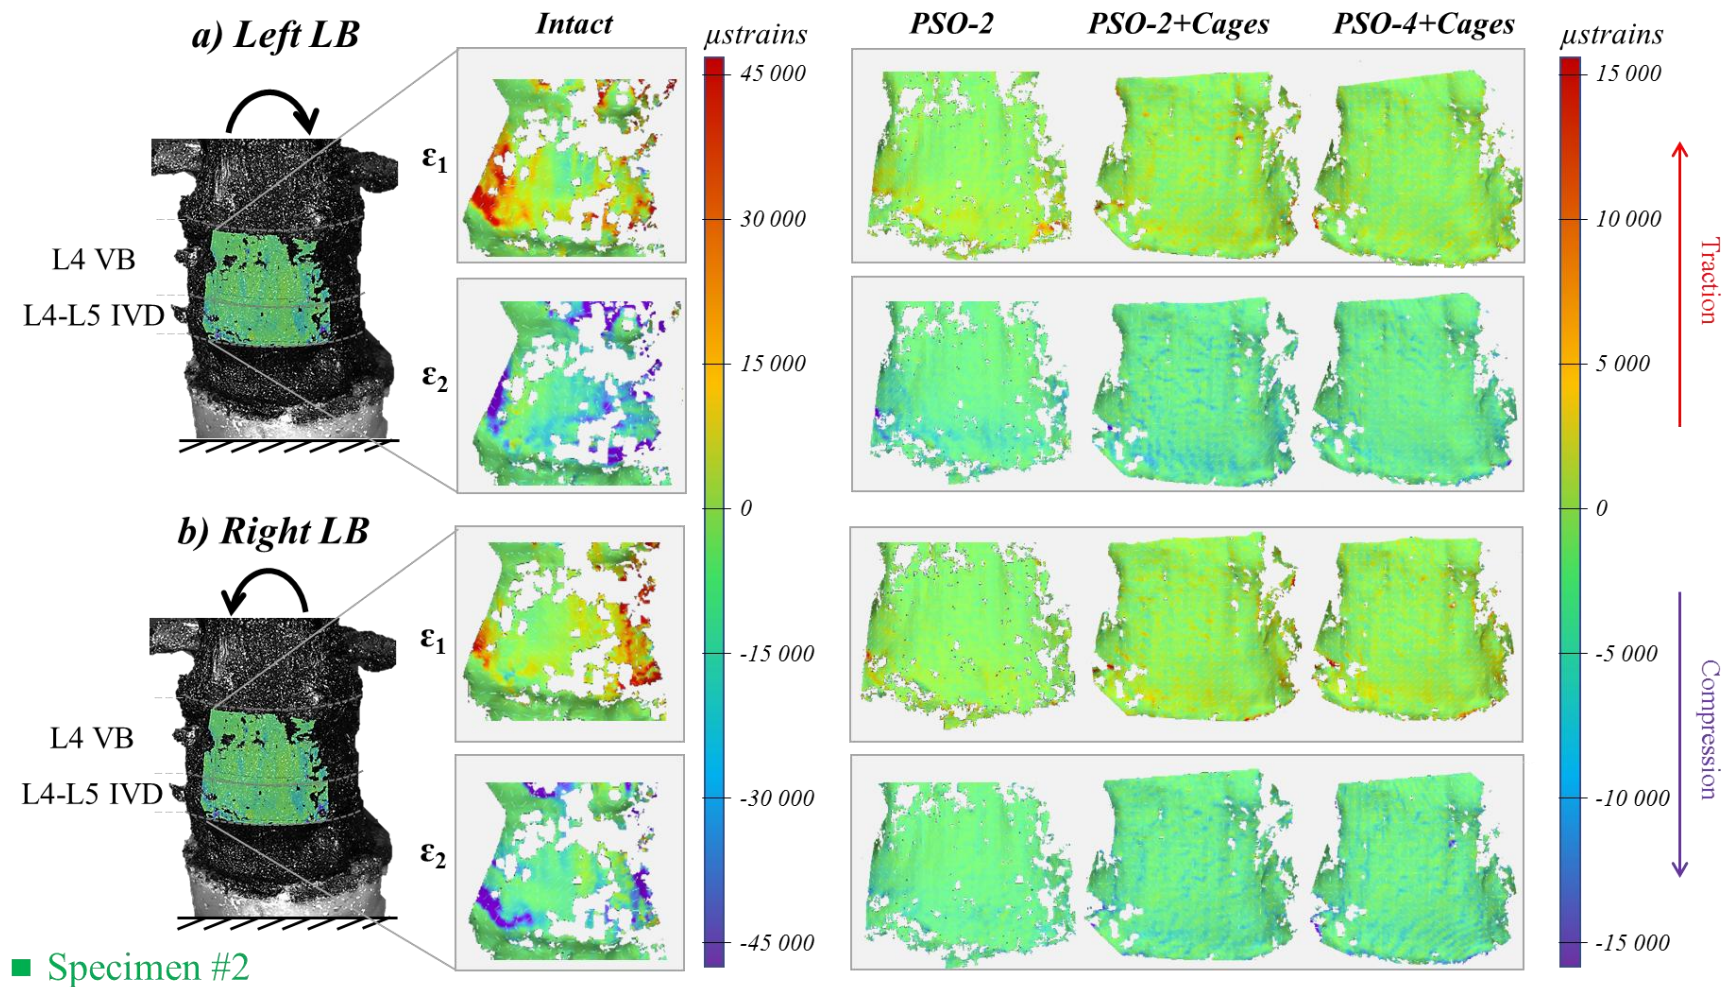

**Supplementary Figure 5:** Specimen #2 – Lateral bending (LB) left (a) and right (b): tensile ( $\epsilon_1$ ) and compressive ( $\epsilon_2$ ) strain maps measured on the “Intact” condition and following PSO at L4 and posterior instrumentation with 2 primary-rods (“PSO-2”), with 2 rods and supplementary intervertebral cages (“PSO-2+Cages”), and with supplementary accessory rods and intervertebral cages (“PSO-4+Cages”). A picture of the specimen with the correlated areas are reported on the left, indicating the treated level (L4) and the caudal IVD (L4-L5). The DIC strain maps have been obtained using the proprietary software Istra 4D (v4.3.1, Dantec Dynamics, Denmark; URL: <https://www.dantecdynamics.com/>).

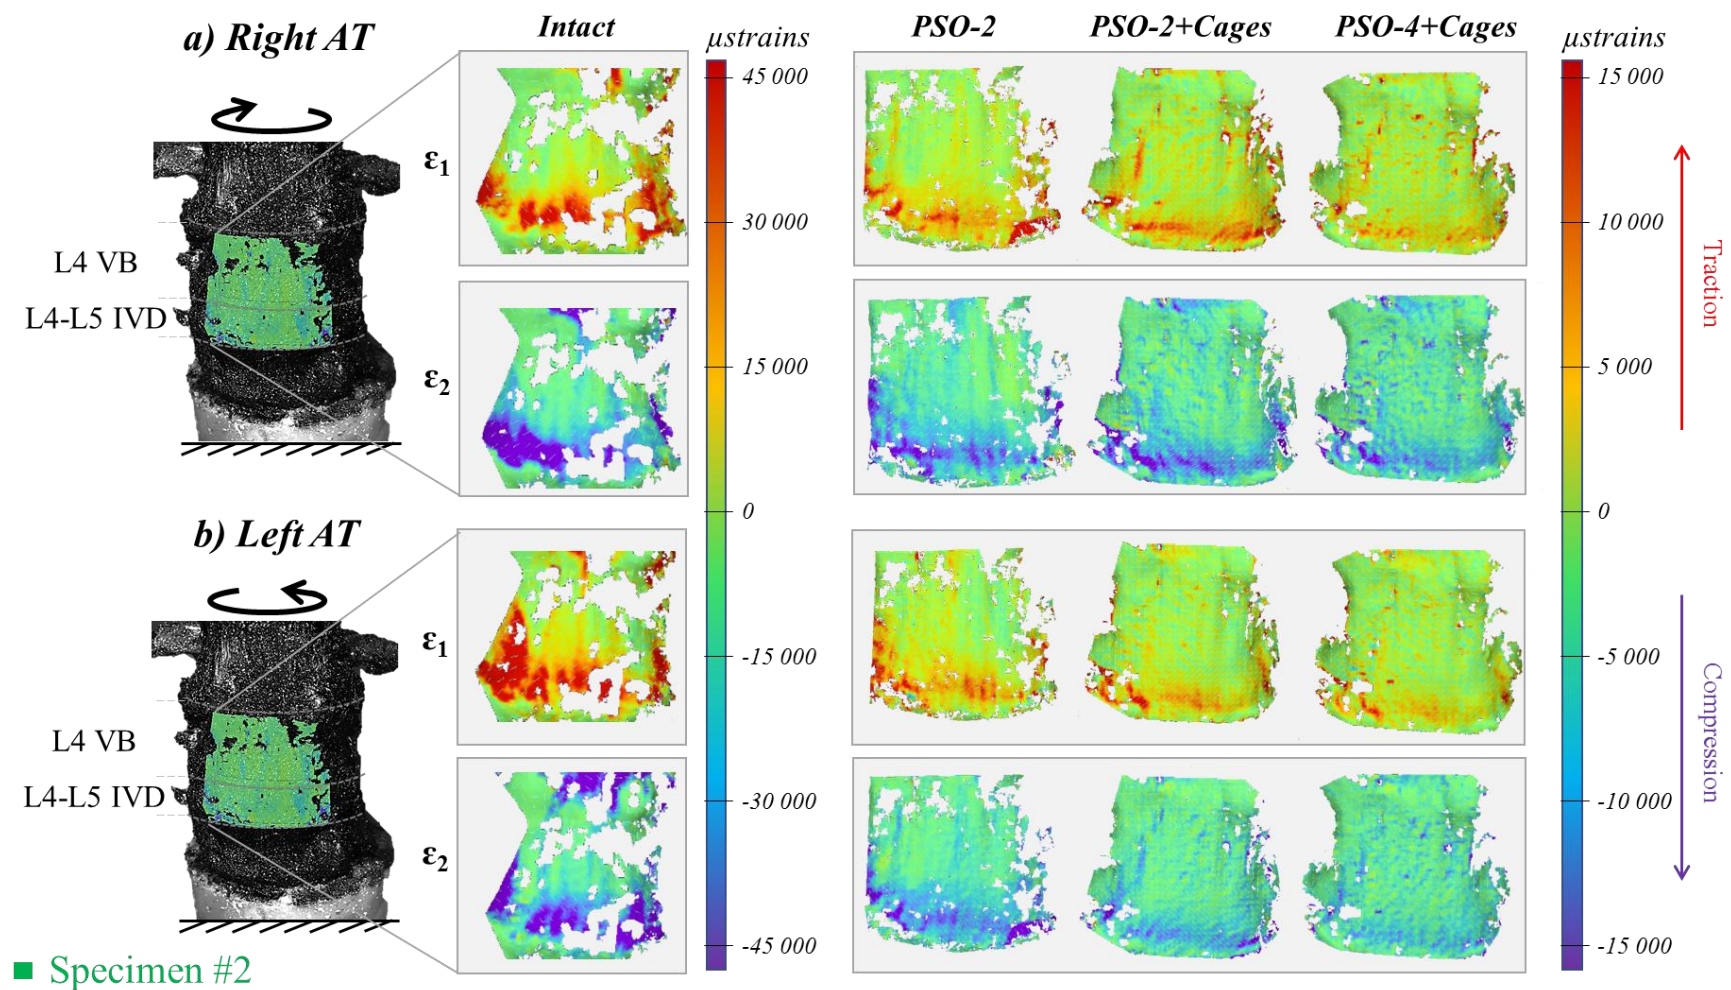

**Supplementary Figure 6:** Specimen #2 – Axial torsion (AT) right (a) and left (b): tensile ( $\epsilon_1$ ) and compressive ( $\epsilon_2$ ) strain maps measured on the “Intact” condition and following PSO at L4 and posterior instrumentation with 2 primary-rods (“PSO-2”), with 2 rods and supplementary intervertebral cages (“PSO-2+Cages”), and with supplementary accessory rods and intervertebral cages (“PSO-4+Cages”). A picture of the specimen with the correlated areas are reported on the left, indicating the treated level (L4) and the caudal IVD (L4-L5). The DIC strain maps have been obtained using the proprietary software Istra 4D (v4.3.1, Dantec Dynamics, Denmark; URL: <https://www.dantecdynamics.com/>).



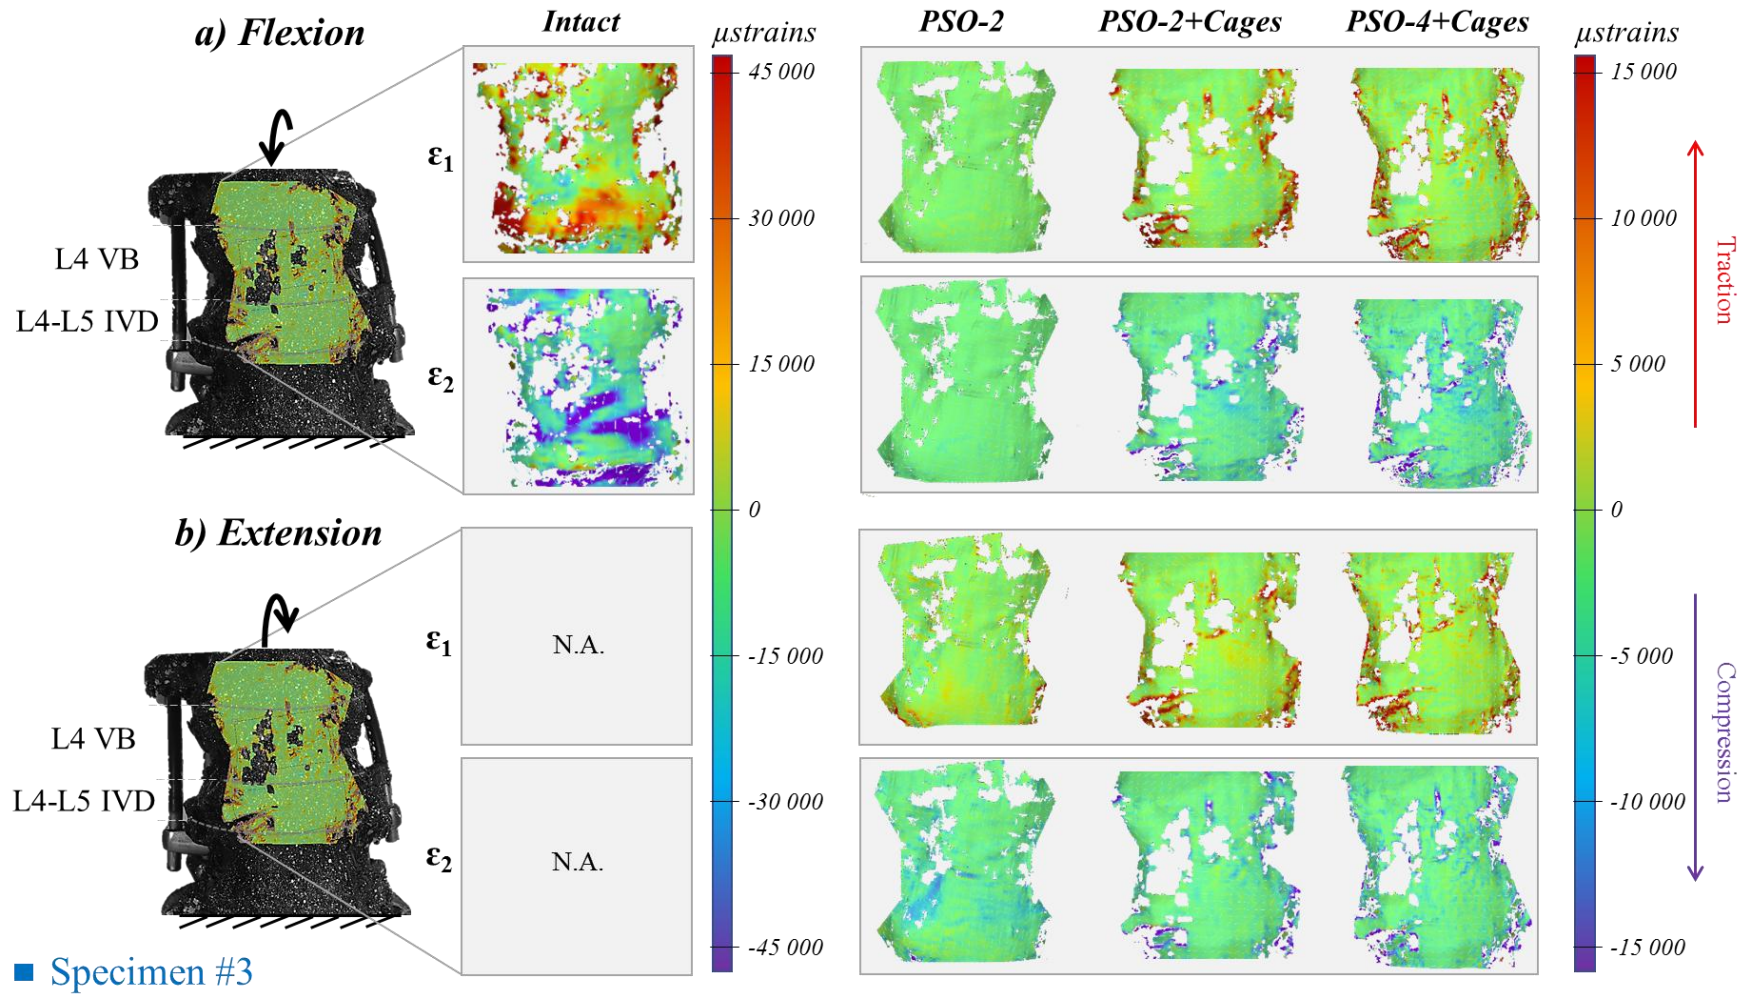

**Supplementary Figure 7:** Specimen #3 – Flexion (a) and extension (b): tensile ( $\epsilon_1$ ) and compressive ( $\epsilon_2$ ) strain maps measured on the “Intact” condition and following PSO at L4 and posterior instrumentation with 2 primary-rods (“PSO-2”), with 2 rods and supplementary intervertebral cages (“PSO-2+Cages”), and with supplementary accessory rods and intervertebral cages (“PSO-4+Cages”). A picture of the specimen with the correlated areas are reported on the left, indicating the treated level (L4) and the caudal IVD (L4-L5). The DIC strain maps have been obtained using the proprietary software Istra 4D (v4.3.1, Dantec Dynamics, Denmark; URL: <https://www.dantecdynamics.com/>).



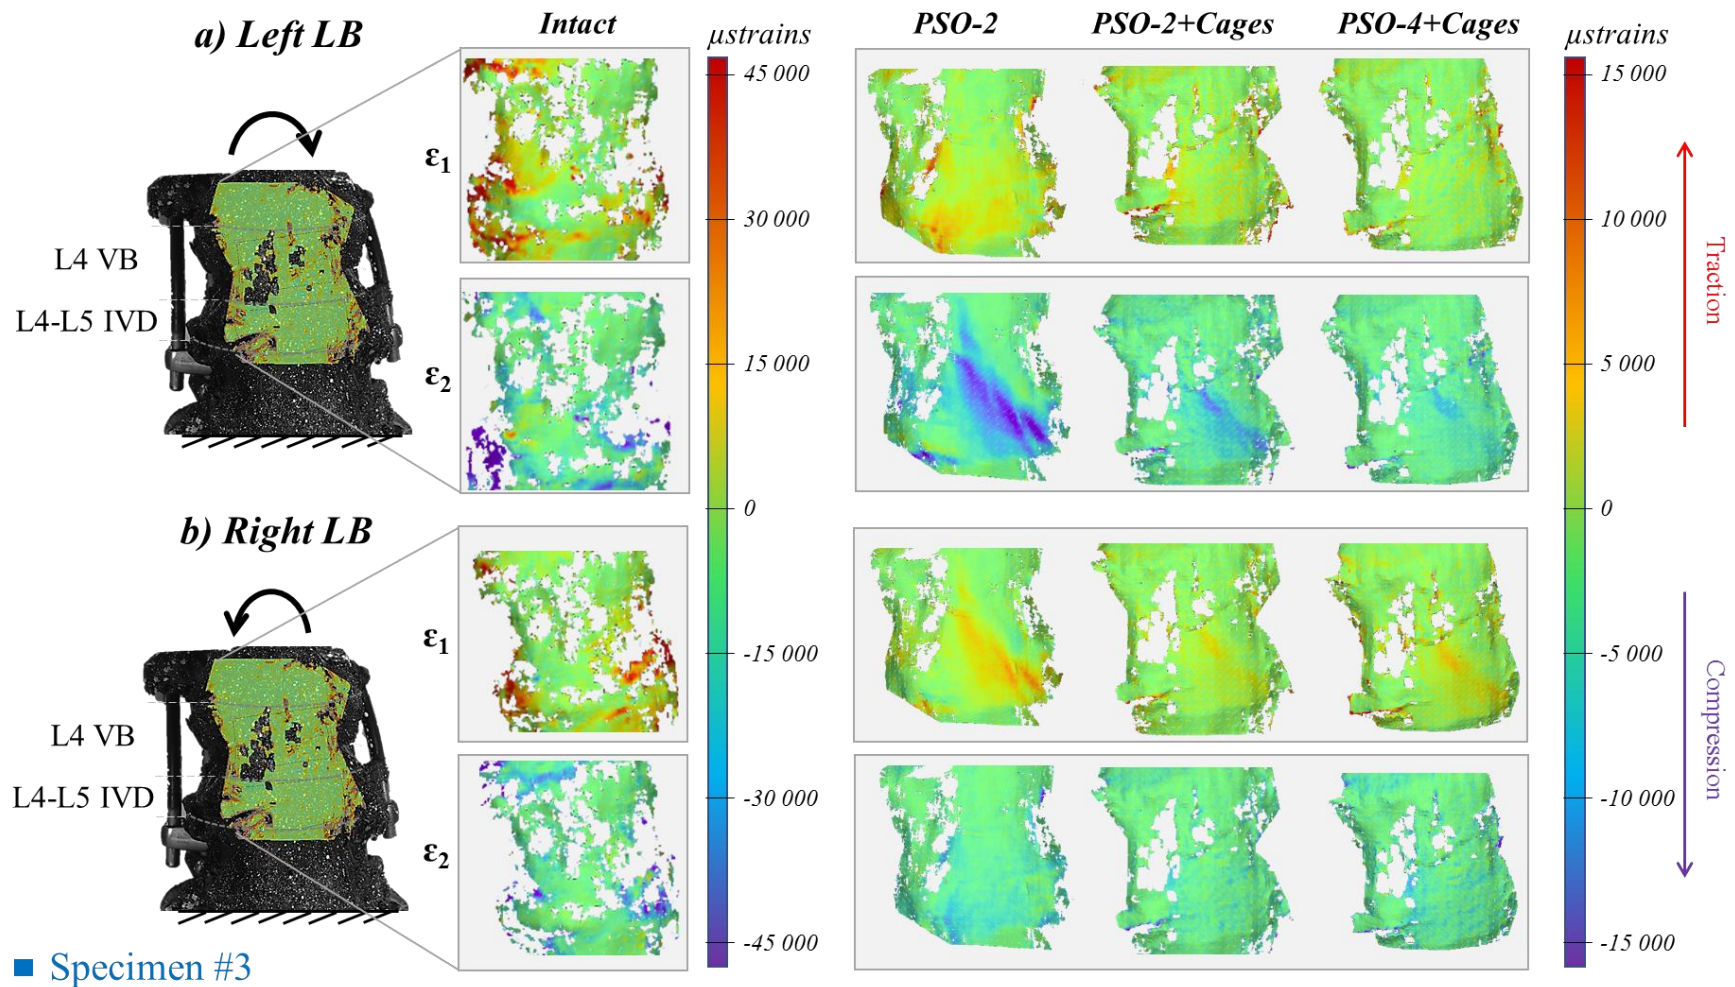

**Supplementary Figure 8:** Specimen #3 – Lateral bending (LB) left (a) and right (b): tensile ( $\epsilon_1$ ) and compressive ( $\epsilon_2$ ) strain maps measured on the “Intact” condition and following PSO at L4 and posterior instrumentation with 2 primary-rods (“PSO-2”), with 2 rods and supplementary intervertebral cages (“PSO-2+Cages”), and with supplementary accessory rods and intervertebral cages (“PSO-4+Cages”). A picture of the specimen with the correlated areas are reported on the left, indicating the treated level (L4) and the caudal IVD (L4-L5). The DIC strain maps have been obtained using the proprietary software Istra 4D (v4.3.1, Dantec Dynamics, Denmark; URL: <https://www.dantecdynamics.com/>).

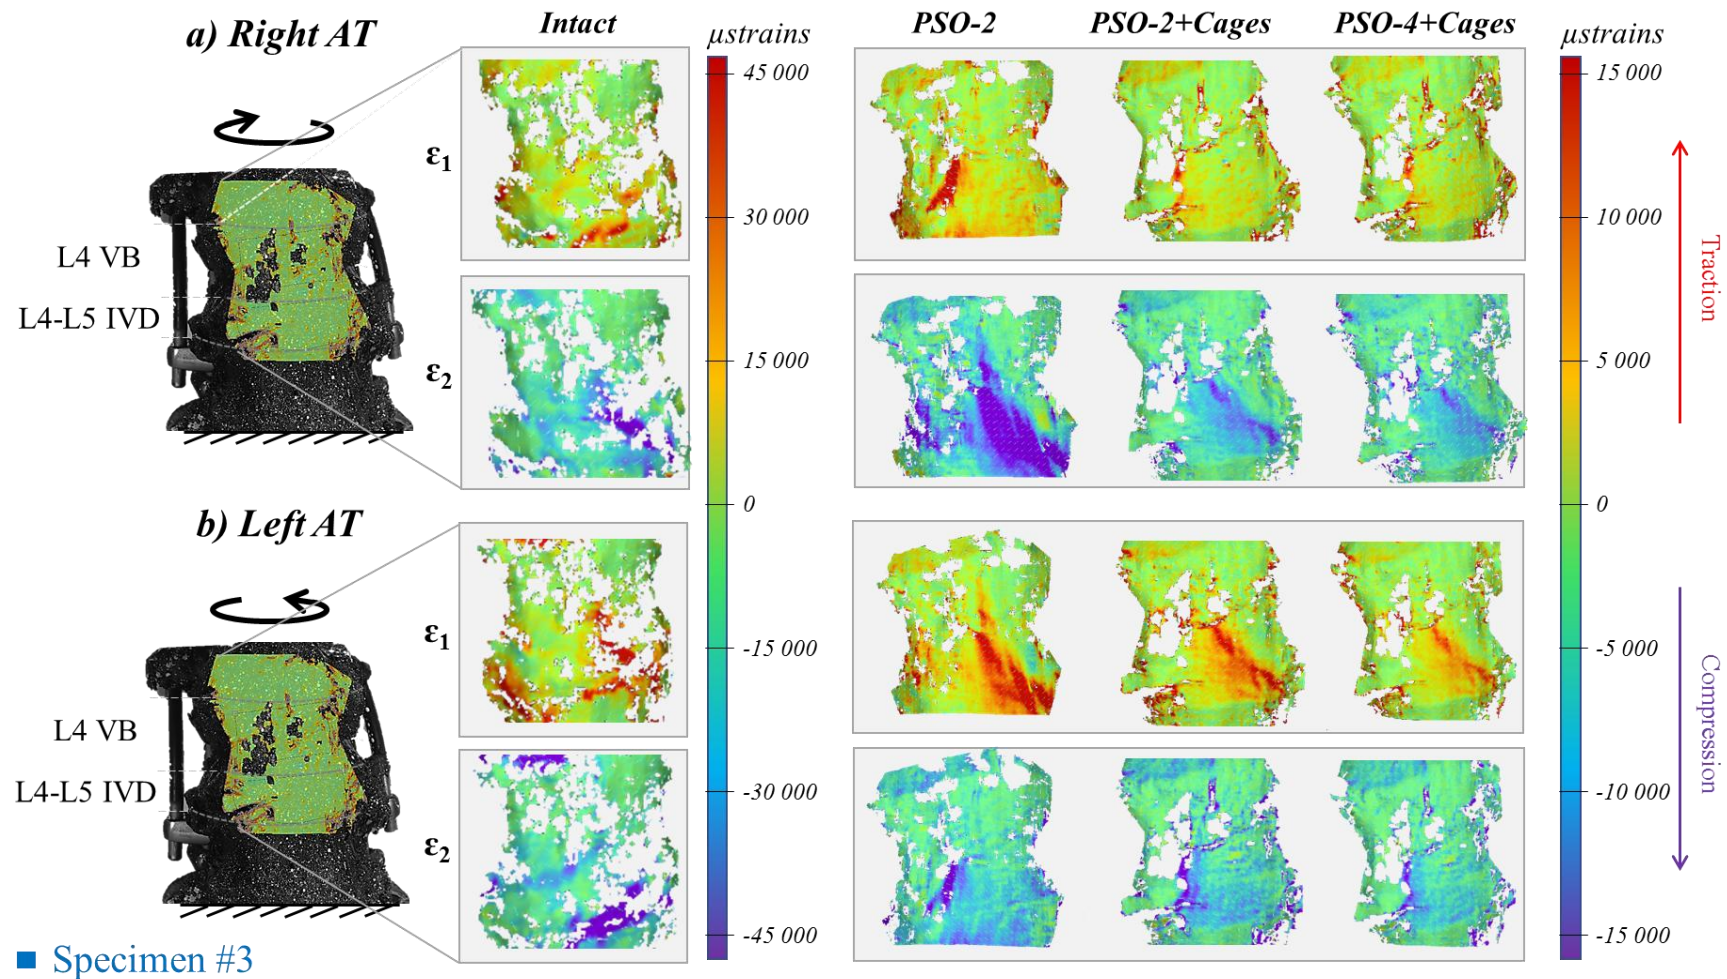

**Supplementary Figure 9:** Specimen #3 – Axial torsion (AT) right (a) and left (b): tensile ( $\epsilon_1$ ) and compressive ( $\epsilon_2$ ) strain maps measured on the “Intact” condition and following PSO at L4 and posterior instrumentation with 2 primary-rods (“PSO-2”), with 2 rods and supplementary intervertebral cages (“PSO-2+Cages”), and with supplementary accessory rods and intervertebral cages (“PSO-4+Cages”). A picture of the specimen with the correlated areas are reported on the left, indicating the treated level (L4) and the caudal IVD (L4-L5). The DIC strain maps have been obtained using the proprietary software Istra 4D (v4.3.1, Dantec Dynamics, Denmark; URL: <https://www.dantecdynamics.com/>).
