# Supplementary material for: Load-sharing biomechanics of lumbar fixation and fusion with pedicle subtraction osteotomy
Source: Springer Nature journal article supplement (doi:10.1038/s41598-021-83251-8), 2021-02-11
Supplement: MOESM2 [file 41598_2021_83251_MOESM2_ESM.pdf]

# **Load-sharing biomechanics of lumbar fixation and fusion with pedicle subtraction osteotomy**

Luigi La Barbera <sup>a</sup>(\*), Hans-Joachim Wilke <sup>b</sup>, Maria Luisa Ruspi <sup>c</sup>, Marco Palanca <sup>c</sup>, Christian Liebsch <sup>b</sup>,  
Andrea Luca <sup>d</sup>, Marco Brayda-Bruno <sup>d</sup>, Fabio Galbusera <sup>e</sup>, Luca Cristofolini <sup>c</sup>

<sup>a</sup> Laboratory of Biological Structure Mechanics, Department of Chemistry, Materials and Chemical Engineering “G. Natta”, Politecnico di Milano, Milan, Italy

<sup>b</sup> Institute of Orthopaedic Research and Biomechanics, Trauma Research Center Ulm, Ulm University, Ulm, Germany

<sup>c</sup> Department of Industrial Engineering, School of Engineering and Architecture, Alma Mater Studiorum – Università di Bologna, Bologna, Italy

<sup>d</sup> Department of Spine Surgery III, IRCCS Istituto Ortopedico Galeazzi, Milan, Italy

<sup>e</sup> IRCCS Istituto Ortopedico Galeazzi, Milan, Italy

(\* *Corresponding author:*

[luigi.labarbera@polimi.it](mailto:luigi.labarbera@polimi.it)

Laboratory of Biological Structure Mechanics

Department of Chemistry, Materials and Chemical Engineering “Giulio Natta”

Politecnico di Milano

Piazza Leonardo da Vinci 32

20133 Milano

Italy

**Supplementary Table 1:** Local (L3-L5) range of motion (RoM) and neutral zone (NZ) for each specimen in every loading condition for each instrumentation step.

| Specimen | Condition   | Flexion/Extension |        | Lateral Bending |        | Axial Torsion |        |
|----------|-------------|-------------------|--------|-----------------|--------|---------------|--------|
|          |             | RoM (°)           | NZ (°) | RoM (°)         | NZ (°) | RoM (°)       | NZ (°) |
| #1       | Intact      | 12.0              | 3.7    | 13.6            | 5.3    | 8.5           | 1.8    |
|          | PSO-2       | 0.6               | 0.1    | 0.0             | 0.0    | 1.7           | 0.1    |
|          | PSO-2+Cages | 0.3               | 0.1    | 0.0             | 0.0    | 1.5           | 0.0    |
|          | PSO-4+Cages | 0.2               | 0.0    | 0.0             | 0.0    | 1.2           | 0.1    |
| #2       | Intact      | 9.7               | 1.9    | 12.4            | 4.4    | 7.8           | 0.8    |
|          | PSO-2       | 0.5               | 0.0    | -0.1            | 0.0    | 1.4           | 0.1    |
|          | PSO-2+Cages | 0.3               | 0.1    | 0.0             | 0.0    | 1.5           | 0.2    |
|          | PSO-4+Cages | 0.4               | -0.1   | 0.0             | 0.0    | 1.4           | 0.2    |
| #3       | Intact      | 14.5              | 5.5    | 12.8            | 3.7    | 5.4           | 0.8    |
|          | PSO-2       | 0.0               | -0.1   | -0.3            | 0.0    | 1.5           | 0.1    |
|          | PSO-2+Cages | -0.5              | 0.1    | 0.0             | 0.1    | 1.5           | 0.2    |
|          | PSO-4+Cages | -0.4              | -0.1   | 0.0             | 0.1    | 1.4           | 0.1    |

**Supplementary Table 2:** Median [min; max] tensile ( $\epsilon_1$ ) and compressive ( $\epsilon_2$ ) strains measured on the ventral spine, on the sub-ROIs at PSO level (L4 VB) and the IVD below (L4-L5), and on primary rods at full load ( $\pm 7.5\text{Nm}$ ) for each loading condition and instrumentation step.

**VENTRAL STRAINS - PSO LEVEL (L4 VB)**

| Condition          |              | Flexion                                      | Extension                                    | Lateral Bending                                             |                                                               | Axial Torsion                                               |                                                               |
|--------------------|--------------|----------------------------------------------|----------------------------------------------|-------------------------------------------------------------|---------------------------------------------------------------|-------------------------------------------------------------|---------------------------------------------------------------|
|                    |              | Median [min; max]<br>( $\mu\text{strains}$ ) | Median [min; max]<br>( $\mu\text{strains}$ ) | Ipsilateral<br>Median [min; max]<br>( $\mu\text{strains}$ ) | Contralateral<br>Median [min; max]<br>( $\mu\text{strains}$ ) | Ipsilateral<br>Median [min; max]<br>( $\mu\text{strains}$ ) | Contralateral<br>Median [min; max]<br>( $\mu\text{strains}$ ) |
| <b>Intact</b>      | $\epsilon_1$ | 4419<br>[3404; 5077] (*)                     | 11796<br>[5595; 17996] (*)                   | 5357<br>[1595; 10642] (*)                                   | 7076<br>[2063; 17813] (*)                                     | 8297<br>[2187; 18756] (*)                                   | 6488<br>[5057; 20052] (*)                                     |
|                    | $\epsilon_2$ | -15321<br>[-19389; -15011] (*)               | -10550<br>[-19208; -1892] (*)                | -7679<br>[-19532; -2055] (*)                                | -3160<br>[-12002; -39]                                        | -6622<br>[-10023; -1504] (*)                                | -5066<br>[-11254; -3328] (*)                                  |
| <b>PSO-2</b>       | $\epsilon_1$ | 1059<br>[451; 2322]                          | 1524<br>[450; 3136]                          | 734<br>[357; 2325] (§)                                      | 897<br>[531; 1922] (#)                                        | 2821<br>[1647; 4156]                                        | 2620<br>[663; 3686]                                           |
|                    | $\epsilon_2$ | -2362<br>[-6970; -450]                       | -440<br>[-1875; -399]                        | -1074<br>[-2625; -570] (§)                                  | -944<br>[-1576; -284]                                         | -2554<br>[-4933; -550]                                      | -2428<br>[-4761; -1505]                                       |
| <b>PSO-2+Cages</b> | $\epsilon_1$ | 1449<br>[1237; 1660]                         | 2369<br>[1793; 2945]                         | 1178<br>[190; 1733]                                         | 1136<br>[780; 7850]                                           | 3009<br>[2001; 5815]                                        | 2145<br>[1438; 10367]                                         |
|                    | $\epsilon_2$ | -2692<br>[-3403; -1980]                      | -1245<br>[-1325; -1164]                      | -939 [-2754; -437] (§)                                      | -970<br>[-1629; -672]                                         | -1935<br>[-3321; -1603]                                     | -2719<br>[-4931; -1982]                                       |
| <b>PSO-4+Cages</b> | $\epsilon_1$ | 1534<br>[855; 1963]                          | 2222<br>[1963; 3108]                         | 910<br>[378; 1695] (§)                                      | 915<br>[575; 1736] (§)                                        | 2816<br>[1196; 3916]                                        | 1878<br>[1078; 2177] (#)                                      |
|                    | $\epsilon_2$ | -2244<br>[-2591; -2058]                      | -1479<br>[-1609; -865]                       | -959<br>[-1742; -494] (§)                                   | -813<br>[-1594; -303]                                         | -1742<br>[-2436; -949] (§)                                  | -2256<br>[-4271; -1586] (§)                                   |

(\*):  $p < 0.05$  vs. all "PSO" cases.

(#):  $p < 0.017$  vs. "Intact".

(§):  $p < 0.05$  vs. "Intact".

Supplementary Table 2: ...continuation

VENTRAL STRAINS - BELOW PSO LEVEL (L4-L5 IVD)

| Condition          |              | Flexion                               | Extension                             | Lateral Bending                                      |                                                        | Axial Torsion                                        |                                                        |
|--------------------|--------------|---------------------------------------|---------------------------------------|------------------------------------------------------|--------------------------------------------------------|------------------------------------------------------|--------------------------------------------------------|
|                    |              | Median [min; max]<br>( $\mu$ strains) | Median [min; max]<br>( $\mu$ strains) | Ipsilateral<br>Median [min; max]<br>( $\mu$ strains) | Contralateral<br>Median [min; max]<br>( $\mu$ strains) | Ipsilateral<br>Median [min; max]<br>( $\mu$ strains) | Contralateral<br>Median [min; max]<br>( $\mu$ strains) |
| <b>Intact</b>      | $\epsilon_1$ | 18613<br>[12948; 19711] (*)           | 20878<br>[18730; 23025] (*)           | 12048<br>[2214; 35789] (*)                           | 9741<br>[890; 14448] (*)                               | 23552<br>[5338; 48700] (*)                           | 27312<br>[16590; 50985] (*)                            |
|                    | $\epsilon_2$ | -23009<br>[-23264; -11530] (*)        | -8319<br>[-10714; -5923] (*)          | -11022<br>[-22819; -4262] (*)                        | -10436<br>[-27986; -2149] (*)                          | -30291<br>[-44627; -15277] (*)                       | -22255<br>[-45939; -7354] (*)                          |
| <b>PSO-2</b>       | $\epsilon_1$ | 3889<br>[508; 8800]                   | 1510<br>[481 ;2365]                   | 2056<br>[884; 6463]                                  | 1450<br>[1191; 3560]                                   | 5245<br>[3580; 7134]                                 | 6362<br>[2857; 12835] (§)                              |
|                    | $\epsilon_2$ | -1392<br>[-7237; -605]                | -1150<br>[-5014; -565]                | -1583<br>[-3016; -1006] (#)                          | -1796<br>[-9345; -1237]                                | -6317<br>[-14297; -3423]                             | -5870<br>[-8309; -4544]                                |
| <b>PSO-2+Cages</b> | $\epsilon_1$ | 1521<br>[890; 2151]                   | 2275<br>[1804; 2745]                  | 2502<br>[1640; 4113]                                 | 2097<br>[1276; 3001]                                   | 5556<br>[2999; 11971]                                | 6337<br>[3490; 13776] (§)                              |
|                    | $\epsilon_2$ | -1954<br>[-2188; -1720]               | -1344<br>[-1774; -914]                | -1949<br>[-2721; -1380]                              | -2536<br>[-4630; -1220]                                | -5909<br>[-14516; -4140]                             | -5946<br>[-10714; -2039]                               |
| <b>PSO-4+Cages</b> | $\epsilon_1$ | 1334<br>[1244; 1968]                  | 2071<br>[1496; 2358]                  | 1558<br>[1011; 3602] (§)                             | 1514<br>[1003; 1997]                                   | 4071<br>[2944; 8718] (§)                             | 5391<br>[3213; 11280] (#)                              |
|                    | $\epsilon_2$ | -1880<br>[-2227; -1728]               | -1713<br>[-1860; -981]                | -1545<br>[-3539; -1004] (#)                          | -1730<br>[-2770; -913] (§)                             | -4207<br>[-6409; -1076] (#)                          | -4681<br>[-8704; -3061] (§)                            |

(\*):  $p < 0.05$  vs. all "PSO" cases.

(#):  $p < 0.017$  vs. "Intact".

(§):  $p < 0.05$  vs. "Intact".

Supplementary Table 2: ...continuation

POSTERIOR STRAINS - PRIMARY RODS

| Condition   |              | Flexion                               | Extension                             | Lateral Bending                                      |                                                        | Axial Torsion                                        |                                                        |
|-------------|--------------|---------------------------------------|---------------------------------------|------------------------------------------------------|--------------------------------------------------------|------------------------------------------------------|--------------------------------------------------------|
|             |              | Median [min; max]<br>( $\mu$ strains) | Median [min; max]<br>( $\mu$ strains) | Ipsilateral<br>Median [min; max]<br>( $\mu$ strains) | Contralateral<br>Median [min; max]<br>( $\mu$ strains) | Ipsilateral<br>Median [min; max]<br>( $\mu$ strains) | Contralateral<br>Median [min; max]<br>( $\mu$ strains) |
| PSO-2       | $\epsilon_1$ | 392<br>[221; 447]                     | 109<br>[81; 161]                      | 185<br>[ 80; 349]                                    | 66<br>[38; 121]                                        | 282<br>[211; 351]                                    | 229<br>[169; 367]                                      |
|             | $\epsilon_2$ | -120<br>[-139; -74]                   | -381<br>[-567; -266]                  | -78<br>[-167; -45]                                   | -231<br>[-402; -130]                                   | -250<br>[-358; -182]                                 | -283<br>[-338; -220]                                   |
| PSO-2+Cages | $\epsilon_1$ | 291<br>[178; 383]                     | 96<br>[70; 137]                       | 175<br>[81; 325]                                     | 64<br>[34; 122]                                        | 296<br>[236; 344]                                    | 237<br>[149; 362]                                      |
|             | $\epsilon_2$ | -85<br>[-116; -59]                    | -329<br>[-483; -218]                  | -58<br>[-157; -36]                                   | -197<br>[-433; -82]                                    | -238<br>[-355; -178]                                 | -283<br>[-346; -210]                                   |
| PSO-4+Cages | $\epsilon_1$ | 189 (**)<br>[128; 235]                | 66 (**)<br>[48; 94]                   | 155<br>[86; 267]                                     | 53<br>[26; 79]                                         | 188 (**, §§)<br>[101; 211]                           | 130<br>[88; 262]                                       |
|             | $\epsilon_2$ | -60 (**)<br>[-68; -43]                | -232 (**)<br>[-315; -156]             | -51<br>[-89; -28]                                    | -172<br>[-240; -75]                                    | -168<br>[-313; -101]                                 | -173 (**, ##)<br>[-240; -115]                          |

(\*\*):  $p < 0.017$  vs. "PSO-2".

(§§):  $p < 0.017$  vs. "PSO-2+Cages".

(##):  $p < 0.05$  vs. "PSO-2+Cages".

**Supplementary Table 3:** Tensile ( $\epsilon_1$ ) and compressive ( $\epsilon_2$ ) strains measured on the ventral spine, on the sub-ROIs at PSO level (L4 VB) and the IVD below (L4-L5), and on primary rods at full load ( $\pm 7.5\text{Nm}$ ) for each specimen in every loading condition and instrumentation step.

**VENTRAL STRAINS - PSO LEVEL (L4 VB)**

| Specimen | Condition   |              | Flexion<br>( $\mu\text{strains}$ ) | Extension<br>( $\mu\text{strains}$ ) | Lateral Bending                        |                                          |                                          |                                        | Axial Torsion                          |                                          |                                          |                                        |
|----------|-------------|--------------|------------------------------------|--------------------------------------|----------------------------------------|------------------------------------------|------------------------------------------|----------------------------------------|----------------------------------------|------------------------------------------|------------------------------------------|----------------------------------------|
|          |             |              |                                    |                                      | Right                                  |                                          | Left                                     |                                        | Right                                  |                                          | Left                                     |                                        |
|          |             |              |                                    |                                      | ipsilateral<br>( $\mu\text{strains}$ ) | contralateral<br>( $\mu\text{strains}$ ) | contralateral<br>( $\mu\text{strains}$ ) | ipsilateral<br>( $\mu\text{strains}$ ) | ipsilateral<br>( $\mu\text{strains}$ ) | contralateral<br>( $\mu\text{strains}$ ) | contralateral<br>( $\mu\text{strains}$ ) | ipsilateral<br>( $\mu\text{strains}$ ) |
| #1       | Intact      | $\epsilon_1$ | 4419                               | 5595                                 | 4347                                   | 11351                                    | 11975                                    | 1945                                   | 14965                                  | 12233                                    | 20052                                    | 18756                                  |
|          |             | $\epsilon_2$ | -19389                             | -19208                               | -19532                                 | -2938                                    | -652                                     | -12332                                 | -9103                                  | -9278                                    | -11254                                   | -10023                                 |
|          | PSO-2       | $\epsilon_1$ | 1059                               | 3136                                 | 1664                                   | 918                                      | 876                                      | 575                                    | 3350                                   | 1874                                     | 3686                                     | 2470                                   |
|          |             | $\epsilon_2$ | -2362                              | -1875                                | -1384                                  | -761                                     | -1126                                    | -803                                   | -2381                                  | -1936                                    | -3988                                    | -2726                                  |
|          | PSO-2+Cages | $\epsilon_1$ | not available                      | not available                        | 190                                    | 780                                      | 1252                                     | 808                                    | 3760                                   | 1990                                     | 2300                                     | 3318                                   |
|          |             | $\epsilon_2$ | not available                      | not available                        | -827                                   | -773                                     | -672                                     | -437                                   | -1603                                  | -2180                                    | -3258                                    | -2472                                  |
|          | PSO-4+Cages | $\epsilon_1$ | 855                                | 2222                                 | 388                                    | 896                                      | 608                                      | 378                                    | 3057                                   | 1078                                     | 1655                                     | 3115                                   |
|          |             | $\epsilon_2$ | -2058                              | -865                                 | -494                                   | -303                                     | -488                                     | -1066                                  | -949                                   | -2334                                    | -2493                                    | -1514                                  |
| #2       | Intact      | $\epsilon_1$ | 3404                               | 17996                                | 1595                                   | 17813                                    | 2659                                     | 8705                                   | 2187                                   | 7449                                     | 5390                                     | 6451                                   |
|          |             | $\epsilon_2$ | -15321                             | -1892                                | -2779                                  | -39                                      | -3935                                    | -12985                                 | -1504                                  | -5419                                    | -3328                                    | -6113                                  |
|          | PSO-2       | $\epsilon_1$ | 2322                               | 1524                                 | 758                                    | 726                                      | 531                                      | 357                                    | 1647                                   | 663                                      | 1570                                     | 2217                                   |
|          |             | $\epsilon_2$ | -6970                              | -399                                 | -579                                   | -284                                     | -530                                     | -570                                   | -1596                                  | -1840                                    | -1505                                    | -550                                   |
|          | PSO-2+Cages | $\epsilon_1$ | 1660                               | 2945                                 | 1177                                   | 1020                                     | 832                                      | 1178                                   | 2001                                   | 1438                                     | 3303                                     | 2699                                   |
|          |             | $\epsilon_2$ | -3403                              | -1325                                | -794                                   | -1015                                    | -972                                     | -1050                                  | -1949                                  | -1997                                    | -1982                                    | -1797                                  |
|          | PSO-4+Cages | $\epsilon_1$ | 1534                               | 3108                                 | 918                                    | 933                                      | 575                                      | 916                                    | 1196                                   | 1466                                     | 2101                                     | 2089                                   |
|          |             | $\epsilon_2$ | -2591                              | -1609                                | -761                                   | -821                                     | -804                                     | -851                                   | -1717                                  | -2060                                    | -1586                                    | -1766                                  |
| #3       | Intact      | $\epsilon_1$ | 5077                               | not available                        | 10642                                  | 2800                                     | 2063                                     | 6367                                   | 10144                                  | 5527                                     | 5057                                     | 6400                                   |
|          |             | $\epsilon_2$ | -15011                             | not available                        | -2055                                  | -12002                                   | -3383                                    | -3026                                  | -7130                                  | -4409                                    | -4712                                    | -5214                                  |
|          | PSO-2       | $\epsilon_1$ | 451                                | 450                                  | 2325                                   | 1496                                     | 1922                                     | 709                                    | 4156                                   | 3366                                     | 3523                                     | 3171                                   |
|          |             | $\epsilon_2$ | -450                               | -440                                 | -2625                                  | -1576                                    | -1179                                    | -1346                                  | -3384                                  | -2920                                    | -4761                                    | -4933                                  |
|          | PSO-2+Cages | $\epsilon_1$ | 1237                               | 1793                                 | 1733                                   | 1533                                     | 7850                                     | 1271                                   | 5815                                   | 10367                                    | 1988                                     | 2651                                   |
|          |             | $\epsilon_2$ | -1980                              | -1164                                | -2754                                  | -1629                                    | -967                                     | -1194                                  | -3321                                  | -4931                                    | -4615                                    | -1921                                  |
|          | PSO-4+Cages | $\epsilon_1$ | 1963                               | 1963                                 | 903                                    | 1736                                     | 1735                                     | 1695                                   | 3916                                   | 2120                                     | 2177                                     | 2575                                   |
|          |             | $\epsilon_2$ | -2244                              | -1479                                | -1742                                  | -1594                                    | -1169                                    | -1707                                  | -1956                                  | -2178                                    | -4271                                    | -2436                                  |

Supplementary Table 3: ...continuation.

**VENTRAL STRAINS - BELOW PSO LEVEL (L4-L5 IVD)**

| Specimen | Condition   |              | Flexion<br>( $\mu$ strains) | Extension<br>( $\mu$ strains) | Lateral Bending                 |                                   |                                   |                                 | Axial Torsion                   |                                   |                                   |                                 |
|----------|-------------|--------------|-----------------------------|-------------------------------|---------------------------------|-----------------------------------|-----------------------------------|---------------------------------|---------------------------------|-----------------------------------|-----------------------------------|---------------------------------|
|          |             |              |                             |                               | Right                           |                                   | Left                              |                                 | Right                           |                                   | Left                              |                                 |
|          |             |              |                             |                               | ipsilateral<br>( $\mu$ strains) | contralateral<br>( $\mu$ strains) | contralateral<br>( $\mu$ strains) | ipsilateral<br>( $\mu$ strains) | ipsilateral<br>( $\mu$ strains) | contralateral<br>( $\mu$ strains) | contralateral<br>( $\mu$ strains) | ipsilateral<br>( $\mu$ strains) |
| #1       | Intact      | $\epsilon_1$ | 19711                       | 23025                         | 35789                           | 12980                             | 6502                              | 14658                           | 23331                           | 25069                             | 48320                             | 48700                           |
|          |             | $\epsilon_2$ | -11530                      | -10714                        | -14506                          | -13797                            | -27986                            | -22819                          | -36727                          | -45939                            | -35396                            | -35254                          |
|          | PSO-2       | $\epsilon_1$ | 3889                        | 2365                          | 2115                            | 1832                              | 1601                              | 1997                            | 5852                            | 8225                              | 5338                              | 5343                            |
|          |             | $\epsilon_2$ | -1392                       | -5014                         | -3016                           | -3539                             | -1237                             | -1200                           | -4934                           | -4615                             | -6682                             | -10263                          |
|          | PSO-2+Cages | $\epsilon_1$ | not available               | not available                 | 2783                            | 2885                              | 3001                              | 2221                            | 7305                            | 13776                             | 7079                              | 11971                           |
|          |             | $\epsilon_2$ | not available               | not available                 | -2721                           | -3313                             | -3608                             | -1986                           | -7009                           | -10714                            | -7584                             | -14516                          |
|          | PSO-4+Cages | $\epsilon_1$ | 1968                        | 2071                          | 1011                            | 1855                              | 1595                              | 3077                            | 7053                            | 11280                             | 6772                              | 8718                            |
|          |             | $\epsilon_2$ | -2227                       | -1860                         | -1004                           | -2491                             | -1572                             | -2444                           | -6409                           | -8704                             | -7857                             | -1076                           |
| #2       | Intact      | $\epsilon_1$ | 12948                       | 18730                         | 2214                            | 14298                             | 14448                             | 10910                           | 23772                           | 23541                             | 50985                             | 19954                           |
|          |             | $\epsilon_2$ | -23264                      | -5923                         | -6044                           | -7074                             | -2149                             | -19971                          | -44627                          | -17515                            | -21595                            | -23263                          |
|          | PSO-2       | $\epsilon_1$ | 8800                        | 1510                          | 1868                            | 1299                              | 1191                              | 884                             | 7134                            | 2857                              | 6990                              | 4622                            |
|          |             | $\epsilon_2$ | -7237                       | -1150                         | -2122                           | -1240                             | -1255                             | -1006                           | -7206                           | -4544                             | -8309                             | -3423                           |
|          | PSO-2+Cages | $\epsilon_1$ | 2151                        | 2745                          | 1800                            | 1823                              | 1858                              | 1640                            | 5779                            | 4084                              | 5594                              | 5332                            |
|          |             | $\epsilon_2$ | -2188                       | -1774                         | -2315                           | -1759                             | -1524                             | -1820                           | -4432                           | -4202                             | -7161                             | -5581                           |
|          | PSO-4+Cages | $\epsilon_1$ | 1334                        | 2358                          | 1832                            | 1003                              | 1997                              | 1231                            | 4340                            | 3213                              | 4009                              | 3782                            |
|          |             | $\epsilon_2$ | -1880                       | -1713                         | -3539                           | -913                              | -1200                             | -1141                           | -3627                           | -3433                             | -5360                             | -4174                           |
| #3       | Intact      | $\epsilon_1$ | 18613                       | not available                 | 13186                           | 4023                              | 890                               | 4885                            | 5338                            | 16590                             | 29554                             | 31269                           |
|          |             | $\epsilon_2$ | -23009                      | not available                 | -7538                           | -16266                            | -3397                             | -4262                           | -15277                          | -22914                            | -7354                             | -25328                          |
|          | PSO-2       | $\epsilon_1$ | 508                         | 481                           | 4113                            | 3560                              | 1214                              | 6463                            | 3580                            | 12835                             | 5734                              | 5148                            |
|          |             | $\epsilon_2$ | -605                        | -565                          | -1418                           | -9345                             | -2337                             | -1748                           | -5428                           | -5059                             | -7888                             | -14297                          |
|          | PSO-2+Cages | $\epsilon_1$ | 890                         | 1804                          | 2203                            | 2335                              | 1276                              | 2835                            | 2999                            | 8596                              | 3490                              | 3838                            |
|          |             | $\epsilon_2$ | -1720                       | -914                          | -1911                           | -4630                             | -1220                             | -1380                           | -4140                           | -4730                             | -2039                             | -6238                           |
|          | PSO-4+Cages | $\epsilon_1$ | 1244                        | 1496                          | 1284                            | 1148                              | 1433                              | 3602                            | 2944                            | 7848                              | 3267                              | 3802                            |
|          |             | $\epsilon_2$ | -1728                       | -981                          | -1321                           | -2770                             | -1888                             | -1770                           | -4240                           | -4002                             | -3061                             | -5767                           |

Supplementary Table 3: ...continuation.

**POSTERIOR STRAINS - PRIMARY RODS**

| Specimen | Condition   |              | Flexion                       |                              | Extension                     |                              | Lateral Bending              |                                |                                |                              | Axial Torsion                |                                |                                |                              |
|----------|-------------|--------------|-------------------------------|------------------------------|-------------------------------|------------------------------|------------------------------|--------------------------------|--------------------------------|------------------------------|------------------------------|--------------------------------|--------------------------------|------------------------------|
|          |             |              | right rod<br>( $\mu$ strains) | left rod<br>( $\mu$ strains) | right rod<br>( $\mu$ strains) | left rod<br>( $\mu$ strains) | Right                        |                                | Left                           |                              | Right                        |                                | Left                           |                              |
|          |             |              |                               |                              |                               |                              | ipsilat.<br>( $\mu$ strains) | contralat.<br>( $\mu$ strains) | contralat.<br>( $\mu$ strains) | ipsilat.<br>( $\mu$ strains) | ipsilat.<br>( $\mu$ strains) | contralat.<br>( $\mu$ strains) | contralat.<br>( $\mu$ strains) | ipsilat.<br>( $\mu$ strains) |
| #1       | PSO-2       | $\epsilon_1$ | 318                           | 221                          | 112                           | 81                           | 228                          | 63                             | 69                             | 139                          | 351                          | 367                            | 245                            | 241                          |
|          |             | $\epsilon_2$ | -94                           | -74                          | -395                          | -266                         | -75                          | -186                           | -223                           | -52                          | -273                         | -261                           | -311                           | -336                         |
|          | PSO-2+Cages | $\epsilon_1$ | 285                           | 178                          | 94                            | 70                           | 205                          | 62                             | 66                             | 146                          | 344                          | 341                            | 246                            | 240                          |
|          |             | $\epsilon_2$ | -83                           | -59                          | -327                          | -218                         | -66                          | -188                           | -207                           | -49                          | -258                         | -257                           | -313                           | -328                         |
|          | PSO-4+Cages | $\epsilon_1$ | 152                           | 128                          | 52                            | 48                           | 184                          | 56                             | 51                             | 126                          | 209                          | 195                            | 144                            | 146                          |
|          |             | $\epsilon_2$ | -45                           | -43                          | -181                          | -156                         | -61                          | -172                           | -172                           | -41                          | -313                         | -156                           | -191                           | -193                         |
| #2       | PSO-2       | $\epsilon_1$ | 447                           | 394                          | 107                           | 104                          | 80                           | 38                             | 39                             | 141                          | 294                          | 213                            | 210                            | 270                          |
|          |             | $\epsilon_2$ | -134                          | -139                         | -367                          | -324                         | -81                          | -130                           | -240                           | -45                          | -227                         | -259                           | -304                           | -209                         |
|          | PSO-2+Cages | $\epsilon_1$ | 294                           | 289                          | 97                            | 106                          | 81                           | 51                             | 34                             | 122                          | 280                          | 200                            | 229                            | 323                          |
|          |             | $\epsilon_2$ | -87                           | -96                          | -330                          | -309                         | -41                          | -170                           | -82                            | -36                          | -218                         | -255                           | -309                           | -210                         |
|          | PSO-4+Cages | $\epsilon_1$ | 235                           | 170                          | 94                            | 82                           | 86                           | 34                             | 26                             | 112                          | 211                          | 88                             | 117                            | 196                          |
|          |             | $\epsilon_2$ | -68                           | -57                          | -315                          | -234                         | -28                          | -112                           | -75                            | -33                          | -143                         | -132                           | -204                           | -134                         |
| #3       | PSO-2       | $\epsilon_1$ | 439                           | 389                          | 161                           | 115                          | 327                          | 104                            | 121                            | 349                          | 211                          | 360                            | 169                            | 337                          |
|          |             | $\epsilon_2$ | -133                          | -107                         | -567                          | -473                         | -95                          | -241                           | -402                           | -167                         | -182                         | -338                           | -220                           | -358                         |
|          | PSO-2+Cages | $\epsilon_1$ | 383                           | 316                          | 137                           | 82                           | 287                          | 93                             | 122                            | 325                          | 236                          | 362                            | 149                            | 312                          |
|          |             | $\epsilon_2$ | -116                          | -84                          | -483                          | -350                         | -87                          | -225                           | -433                           | -157                         | -178                         | -346                           | -210                           | -355                         |
|          | PSO-4+Cages | $\epsilon_1$ | 207                           | 226                          | 79                            | 50                           | 267                          | 79                             | 66                             | 213                          | 101                          | 262                            | 95                             | 181                          |
|          |             | $\epsilon_2$ | -66                           | -62                          | -292                          | -230                         | -81                          | -228                           | -240                           | -89                          | -101                         | -240                           | -115                           | -200                         |
